# Supplementary material for: Obesity-associated improvements in metabolic profile through expansion of adipose tissue
Source: JCI journal article supplement (doi:10.1172/jci31021), 2007-08-25
Supplement: sd1 [file 1]

Table.1

| Gene product                                                           | Fold change | Accession No. | Gene product                                          | Fold change | Accession No. |
|------------------------------------------------------------------------|-------------|---------------|-------------------------------------------------------|-------------|---------------|
| <b>Adipokines</b>                                                      |             |               | <b>Insulin signaling related</b>                      |             |               |
| Adiponectin                                                            | +2.97       | NM009605      | Insulin receptor (IR)                                 | +1.81       | NM010568      |
| Resistin                                                               | +3.54       | NM022984      | Insulin receptor substrate 1 (IRS1)                   | +2.80       | AY169784      |
| Adipsin                                                                | +6.76       | NM013459      | Insulin receptor substrate 3 (IRS3)                   | +1.75       | NM010571      |
| <b>FA uptake and metabolism related</b>                                |             |               | Insulin-like growth factor binding protein 3 (IGFBP3) | +2.69       | AK077477      |
| Fatty acid transporter 1 (FATP1)                                       | +5.08       | NM011977      | Insulin-like growth factor binding protein 4 (IGFBP4) | +1.54       | NM010517      |
| Fatty acid transporter 4 (FATP4)                                       | +1.53       | AF072759      | Insulin-like growth factor 2 receptor (IGF2R)         | -2.89       | NM010515      |
| CD36 antigen                                                           | +1.59       | AK004192      | Insulin-like growth factor 1 (IGF1)                   | -1.67       | NM010512      |
| Carnitine/acylcarnitine translocase                                    | +1.78       | NM020520      | <b>Extracellular matrix related</b>                   |             |               |
| Acyl-CoA synthetase long-chain family member 1 (Acsl1)                 | +2.57       | NM007981      | Procollagen, type II, ( $\alpha$ -1)                  | +1.53       | AK028295      |
| Acyl-Coenzyme A oxidase-like (Acoxl)                                   | +1.79       | NM028765      | Procollagen, type IV, ( $\alpha$ -6)                  | +3.15       | BC004800      |
| 3-hydroxyacyl-Coenzyme A dehydrogenase                                 | +1.64       | NM008212      | Procollagen, type XIII, ( $\alpha$ -1)                | +2.15       | BC034164      |
| Enoyl-Coenzyme A, hydratase/<br>3-hydroxyacyl Coenzyme A dehydrogenase | +1.78       | AK004867      | Integrin $\alpha$ 6                                   | +2.42       | AK083717      |
| Acetyl-Coenzyme A carboxylase $\beta$                                  | +6.37       | NM133904      | Integrin $\alpha$ 7                                   | +1.58       | NM008398      |
| Phosphoenolpyruvate carboxykinase (PEPCK)                              | +4.74       | AK028046      | Syndecan 4                                            | +1.65       | NM011521      |
| Fatty acid binding protein 4                                           | +2.61       | NM011596      | Procollagen, type I, ( $\alpha$ -1)                   | -3.94       | U03419        |
| Fatty acid binding protein 9                                           | +11.58      | BC018558      | Procollagen, type I, ( $\alpha$ -2)                   | -2.78       | BC012438      |
| <b>TG metabolism related</b>                                           |             |               | Procollagen, type III, ( $\alpha$ -1)                 | -7.96       | NM009930      |
| Diacylglycerol O-acyltransferase 1 (DGAT-1)                            | +2.74       | NM010046      | Procollagen, type IV, ( $\alpha$ -1)                  | -1.87       | AK052735      |
| 1-acylglycerol-3-phosphate O-acyltransferase 2 (AGPAT2)                | +1.65       | NM026212      | Procollagen, type V, ( $\alpha$ -1)                   | -2.12       | NM015734      |
| <b>Lipolysis</b>                                                       |             |               | Procollagen, type V, ( $\alpha$ -2)                   | -2.28       | BC055077      |
| Lipase, hormone sensitive (HSL)                                        | +3.30       | U08188        | Procollagen, type VI, ( $\alpha$ -1)                  | -2.36       | AK027944      |
| Uncoupling protein 3 (UCP3)                                            | +1.73       | NM009464      | Procollagen, type VI, ( $\alpha$ -2)                  | -2.36       | X65582        |
| <b>Glucose uptake and metabolism related</b>                           |             |               | Procollagen, type VI, ( $\alpha$ -3)                  | -5.33       | BC057903      |
| Glucose transporter 4 (GLUT4)                                          | +2.54       | BC014282      | Procollagen, type XV ( $\alpha$ -1)                   | -2.29       | BC052428      |
| Glucose transporter 3 (GLUT3)                                          | +1.87       | X69698        | Procollagen, type XVIII, ( $\alpha$ -1)               | -1.74       | D17546        |
| Hexokinase 2                                                           | +1.90       | NM013820      | Procollagen, type XXVII, ( $\alpha$ -1)               | -1.80       | NM025685      |
| Phosphofructokinase (B-type)                                           | +1.69       | NM008826      | Integrin $\alpha$ 4                                   | -2.56       | X53176        |
| 2,3-bisphosphoglycerate mutase                                         | +2.38       | NM007563      | Integrin $\beta$ 2                                    | -3.33       | X14951        |
| Pyruvate dehydrogenase kinase 4 (PDH kinase 4)                         | +3.02       | BC026134      | Integrin $\alpha$ 9                                   | -1.94       | NM133721      |
| Pyruvate dehydrogenase kinase 2 (PDH kinase 2)                         | +1.74       | NM133667      | Integrin $\alpha$ 11                                  | -2.31       | NM176922      |
| <b>Cholesterol biosynthesis related</b>                                |             |               | Integrin $\alpha$ M                                   | -2.59       | NM008401      |
| 3-hydroxy-3-methylglutaryl-Coenzyme A reductase (HMGr)                 | -1.99       | BC059873      | Integrin $\alpha$ X                                   | -3.35       | NM021334      |
| Sterol regulatory element binding protein 1 (SREBP1)                   | -2.03       | NM011480      | Integrin $\alpha$ V                                   | -1.66       | BC048857      |
| <b>Lipoprotein metabolism related</b>                                  |             |               | Syndecan 1                                            | -2.11       | NM011519      |
| High density lipoprotein binding protein 1                             | +2.20       | AK050431      | Syndecan 2                                            | -1.73       | NM008304      |
| Very low density lipoprotein receptor                                  | +1.68       | NM013703      | Syndecan 3                                            | -2.74       | NM011520      |
| <b>Transcriptional regulation related</b>                              |             |               | <b>Metalloprotease related</b>                        |             |               |
| Peroxisome proliferator activated receptor gamma (PPAR $\gamma$ )      | +2.88       | NM008904      | Matrix metalloproteinase 28                           | +1.87       | AK051258      |
| PPAR $\gamma$ coactivator 1 alpha (PGC1 $\alpha$ )                     | +1.93       | NM133249      | Tissue inhibitor of metalloproteinase 3               | +1.85       | NM011595      |
| PPAR $\gamma$ coactivator 1 beta (PGC1 $\beta$ )                       | +1.71       | U01841        | Tissue inhibitor of metalloproteinase 4               | +9.17       | NM080639      |
| CCAAT/enhancer binding protein alpha, (C/EBP $\alpha$ )                | +2.04       | BC058161      | Matrix metalloproteinase 2                            | -4.09       | NM008610      |
| Forkhead box C1 (Foxc1)                                                | +2.42       | NM008592      | Matrix metalloproteinase 3                            | -28.60      | NM010809      |
| Forkhead box C2 (Foxc2)                                                | +1.53       | X74040        | Matrix metalloproteinase 7                            | -2.87       | NM010810      |
| Retinoid X receptor alpha (Rxr $\alpha$ )                              | +2.10       | NM011305      | Matrix metalloproteinase 8                            | -1.56       | NM008611      |
| Retinoid X receptor gamma (Rxr $\gamma$ )                              | +1.50       | NM009107      | Matrix metalloproteinase 9                            | -2.49       | D12712        |
|                                                                        |             |               | Matrix metalloproteinase 12                           | -3.99       | NM008605      |
|                                                                        |             |               | Matrix metalloproteinase 14                           | -4.18       | NM008608      |
|                                                                        |             |               | Matrix metalloproteinase 19                           | -2.37       | AK086808      |
|                                                                        |             |               | Tissue inhibitor of metalloproteinase 1               | -2.85       | BC008107      |
|                                                                        |             |               | Tissue inhibitor of metalloproteinase 2               | -2.00       | NM011594      |

Table 1. continued

| Gene product                                                                        | Fold change | Accession No. |
|-------------------------------------------------------------------------------------|-------------|---------------|
| Citric acid cycle related                                                           |             |               |
| Mitochondrial aconitase 2                                                           | +1.72       | NM080633      |
| Malate dehydrogenase 1                                                              | +1.76       | NM008618      |
| Respiratory chain related                                                           |             |               |
| NADH dehydrogenase (ubiquinone) 1 $\alpha$ subcomplex, 4                            | +1.83       | AK005084      |
| NADH dehydrogenase (ubiquinone) 1 $\alpha$ subcomplex, 7                            | +1.61       | BC055698      |
| NADH dehydrogenase (ubiquinone) 1 $\alpha$ subcomplex 10                            | +1.53       | NM024197      |
| NADH dehydrogenase (ubiquinone) 1 $\alpha$ subcomplex, 12                           | +1.57       | NM025551      |
| NADH dehydrogenase (ubiquinone) 1 $\beta$ subcomplex, 9                             | +1.53       | NM023172      |
| NADH dehydrogenase (ubiquinone) 1, $\alpha/\beta$ subcomplex, 1                     | +1.71       | NM028177      |
| Succinate dehydrogenase complex, subunit A                                          | +1.56       | AF095938      |
| Succinate dehydrogenase complex, subunit D                                          | +1.60       | NM025848      |
| Ubiquinol-cytochrome c reductase                                                    | +1.65       | NM025710      |
| ATP synthase mitochondrial F1 complex assembly factor 2                             | +1.83       | NM145427      |
| ATP synthase, H <sup>+</sup> transporting mitochondrial F1 complex, $\beta$ subunit | +1.66       | BC037127      |
| ROS detoxification related                                                          |             |               |
| Superoxide dismutase 3                                                              | +1.54       | NM011435      |
| Glutathione peroxidase 4                                                            | +1.64       | NM008162      |
| Cell adhesion molecule related                                                      |             |               |
| Neural cell adhesion molecule 1 (NCAM1)                                             | -3.74       | X15052        |
| Neuronal cell adhesion molecule short isoform (NrCAM)                               | -4.87       | NM176930      |
| Intercellular adhesion molecule (ICAM1)                                             | -2.06       | NM010493      |
| Macrophage marker related                                                           |             |               |
| F4/80                                                                               | -5.21       | NM010130      |
| Inflammatory cytokine related                                                       |             |               |
| Tumor necrosis factor (TNF)                                                         | -2.29       | AY423855      |
| Tumor necrosis factor receptor superfamily, member 1b                               | -2.67       | X76401        |
| Tnf receptor-associated factor 1 (TRAF1)                                            | -1.56       | NM009421      |
| Tnf receptor-associated factor 5 (TRAF5)                                            | -2.04       | NM011633      |
| TNFRSF1A-associated via death domain (TRADD)                                        | -1.53       | BC028542      |
| Interleukin 1 $\alpha$                                                              | -1.82       | M14639        |
| Interleukin 1 $\beta$                                                               | -4.38       | NM008361      |
| Interleukin 10                                                                      | -1.87       | NM010548      |
| Interleukin 1 receptor, type I                                                      | -1.67       | NM008362      |
| Interleukin 1 receptor, type II                                                     | -4.54       | NM010555      |
| Interleukin 2 receptor $\gamma$ chain                                               | -3.27       | NM013563      |
| Interleukin 7 receptor $\alpha$ chain                                               | -3.44       | NM008372      |
| Interleukin 8 receptor b                                                            | -2.20       | NM009909      |
| Interleukin 10 receptor $\alpha$                                                    | -2.22       | NM008348      |
| Interleukin 11 receptor $\alpha$ chain 1                                            | -1.75       | NM010550      |
| Interleukin 12 receptor $\beta$ 2                                                   | -1.54       | NM008354      |
| Interleukin 13 receptor $\alpha$ 1                                                  | -2.20       | BC021472      |
| Interleukin 13 receptor $\alpha$ 2                                                  | -2.59       | NM008356      |
| Interleukin 27 receptor $\alpha$                                                    | -1.88       | NM016671      |
| Colony stimulating factor 2 receptor, $\beta$ 1                                     | -2.12       | NM007780      |
| Colony stimulating factor 2 receptor, $\beta$ 2                                     | -3.25       | NM007781      |

## Supplemental Table 1

Alterations in transcriptional profiles in the epididymal adipose tissue of 12 week old male *ob/ob* and transgenic *ob/ob* mice. mRNA levels for key metabolic enzymes have been selected and have been grouped into subcategories. Microarray slides were scanned as described in Materials and Methods. Raw data and normalized gene calls were delivered by NimbleGen. The ratio of Cy3 to Cy5 for each feature was calculated from all normalized data. The final values were taken from the average of three slides and were log transformed for statistical analysis. Only statistically significant values above and below 1.5-fold differences are shown.
